# Supplementary material for: A possible link between recurrent upper respiratory tract infections and lower cytokine production in patients with Q fever fatigue syndrome
Source: PubMed Central journal article supplement (PMC7163623; doi:10.1002/eji.201848012), 2019-05-09
Supplement: EJI-49-1015-s001.pdf [file EJI-49-1015-s001.pdf]

# European Journal of Immunology

**Supporting Information**

**for**

**DOI 10.1002/eji.201848012**

Ruud P.H. Raijmakers, Anne F.M. Jansen, Stephan P. Keijmel,  
Jos W.M. van der Meer, Leo A.B. Joosten, Mihai G. Netea  
and Chantal P. Bleeker-Rovers

**A possible link between recurrent upper respiratory tract infections and lower  
cytokine production  
in patients with Q fever fatigue syndrome**

**Supplementary table 1. Primers used for various cytokines and chemokines**

| <b>Cytokine/chemokine</b>     | <b>Primer</b> | <b>Forward</b>         | <b>Reverse</b>          |
|-------------------------------|---------------|------------------------|-------------------------|
| <b>IL-1<math>\beta</math></b> | 1             | AATCCCAGAGCAGCCTGTTG   | AACAGCGAGGGAGAAACTGG    |
|                               | 2             | CATGGCTGCTTCAGACACCT   | ACACATGAACGTAGCCGTCA    |
|                               | 3             | TGAGTGACTTCCCCATGACG   | TCTGCTCCAGCTCTCCTAGC    |
|                               | 4             | CTGGCGAGCTCAGGTACTTC   | ACACATGAACGTAGCCGTCA    |
|                               | 5             | TCAGATGAGGTCCAAAGCGG   | TTTGCTACCTGGGGTGAAGC    |
| <b>MCP-1</b>                  | 1             | CCGAGAGGCTGAGACTAACC   | CTATGAGCAGCAGGCACAGA    |
|                               | 2             | CCCAGAAACATCCAATTCTCA  | GGAATGAAGGTGGCTGCTAT    |
| <b>IP-10</b>                  | 1             | ATGCAGGTACAGCGTACAGTT  | GAACACTGTGCTAACCTTCTCTG |
| <b>IL-10</b>                  | 1             | ATGCGGTCTTTTTGATGCC    | GGTCCCATCACTGTTGAATCCT  |
|                               | 2             | TCCAGCTGATCCTTCATTTGCT | AAAGGGCATCAAAAAGACCGC   |
| <b>IL-13</b>                  | 1             | CATTGCTCTCACTTGCCTTGG  | CCGACACTCACCTTCTGGTT    |
|                               | 2             | GGTCAACATCACCCAGAACCA  | TCATCTTGGGAATCACCCACC   |
|                               | 3             | TGGTCAACATCACCCAGAACC  | GTCATGACCTCATCTTGGGA    |

Abbreviations: *IL* = interleukin; *MCP* = monocyte chemoattractant protein; *IP* = Interferon Gamma-Induced Protein.

**Supplementary table 2. Luminex assay determining 25 different cytokines and chemokines.**

| Luminex                    | Cytokines       | Chemokines     |
|----------------------------|-----------------|----------------|
| <b>25-plex assay panel</b> | GM-CSF          | Eotaxin        |
|                            | IFN $\alpha$    | IP-10          |
|                            | IFN $\gamma$    | MCP-1          |
|                            | IL-1 $\beta$    | MIG            |
|                            | IL-1RA          | MIP-1 $\alpha$ |
|                            | IL-2            | MIP-1 $\beta$  |
|                            | IL-2R           | RANTES         |
|                            | IL-4            |                |
|                            | IL-5            |                |
|                            | IL-6            |                |
|                            | IL-7            |                |
|                            | IL-8            |                |
|                            | IL-10           |                |
|                            | IL-12 (p40/p70) |                |
|                            | IL-13           |                |
|                            | IL-15           |                |
|                            | IL-17           |                |
|                            | TNF $\alpha$    |                |

Abbreviations: *GM-CSF* = granulocyte-macrophage colony-stimulating factor; *IFN* = interferon; *IL* = interleukin; *TNF* = tumor necrosis factor; *IP* = Interferon Gamma-Induced Protein; *MCP* = monocyte chemoattractant protein; *MIG* = monokine induced by gamma interferon; *MIP* = macrophage inflammatory protein; *RANTES* = regulated on activation, normal T cell expressed and secreted.

Supplementary Figure 1. Negative and positive control for H3K4me3

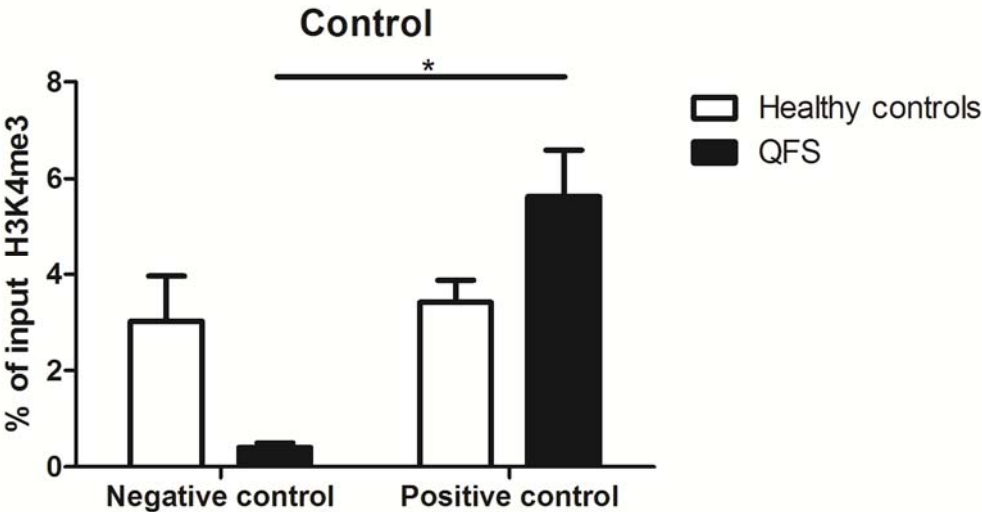

Expression of H3K4me3 in monocytes of QFS patients compared to healthy controls, using myoglobin as a negative and H2B as a positive control. Results are depicted as mean  $\pm$  SEM. Data are derived from one single experiment that consisted of 15 patients and 16 healthy controls.

Abbreviations: *H3K4me3* = histone 3 lysine 4 trimethylation; *QFS* = Q fever fatigue syndrome; *SEM* = standard error of mean.

\*  $P \leq 0.05$
